# Supplementary material for: Post-Stroke Social Isolation Reduces Cell Proliferation in the Dentate Gyrus and Alters miRNA Profiles in the Aged Female Mice Brain
Source: PubMed Central journal article supplement (PMC7795886; doi:10.3390/ijms22010099), 2020-12-24
Supplement: ijms-22-00099-s001.pdf [file ijms-22-00099-s001.pdf]

**Post-stroke social isolation reduces cell proliferation in the dentate gyrus and alters miRNA profiles in the aged female mice brain**

Aleah Holmes, Yan Xu, Juneyoung Lee, Michael E Maniskas, Liang Zhu, Louise D.

McCullough, Venugopal Reddy Venna

**Supplemental Material**

## Supplemental figures (predictive pathway analysis)

### Supplemental Figure 1A

miRSystem

Home Target Gene Summary Report **Pathway Ranking Summary**

Pathway Ranking Summary [Mus Musculus]

Page 1 of 2 100 View 1 - 100 of 196

| Category | Term                                   | Total Genes of | Union Targets i | Union miRNAs i | Score |
|----------|----------------------------------------|----------------|-----------------|----------------|-------|
| KEGG     | NEUROTROPHIN_SIGNALING_PATHWAY         | 131            | 37              | 3              | 2.415 |
| BIOCARTA | BIOCARTA_CHREBP2_PATHWAY               | 44             | 19              | 4              | 2.187 |
| KEGG     | FOCAL_ADHESION                         | 197            | 41              | 4              | 2.162 |
| KEGG     | AXON_GUIDANCE                          | 131            | 38              | 3              | 2.118 |
| KEGG     | RENAL_CELL_CARCINOMA                   | 71             | 23              | 4              | 1.938 |
| KEGG     | INSULIN_SIGNALING_PATHWAY              | 137            | 35              | 4              | 1.812 |
| KEGG     | MTOR_SIGNALING_PATHWAY                 | 53             | 19              | 4              | 1.765 |
| KEGG     | PATHWAYS_IN_CANCER                     | 323            | 52              | 4              | 1.710 |
| BIOCARTA | BIOCARTA_MAPK_PATHWAY                  | 87             | 23              | 3              | 1.550 |
| KEGG     | MAPK_SIGNALING_PATHWAY                 | 271            | 48              | 3              | 1.465 |
| KEGG     | UBIQUITIN_MEDIATED_PROTEOLYSIS         | 138            | 28              | 4              | 1.337 |
| BIOCARTA | BIOCARTA_GPCR_PATHWAY                  | 35             | 13              | 2              | 1.323 |
| KEGG     | REGULATION_OF_ACTIN_CYTOSKELETON       | 215            | 34              | 4              | 1.314 |
| KEGG     | WNT_SIGNALING_PATHWAY                  | 153            | 31              | 3              | 1.270 |
| KEGG     | ERBB_SIGNALING_PATHWAY                 | 87             | 24              | 3              | 1.240 |
| KEGG     | FC_GAMMA_R-MEDIATED_PHAGOCYTOSIS       | 90             | 18              | 3              | 1.220 |
| BIOCARTA | BIOCARTA_PDGF_PATHWAY                  | 32             | 11              | 3              | 1.206 |
| KEGG     | CHEMOKINE_SIGNALING_PATHWAY            | 187            | 35              | 3              | 1.195 |
| KEGG     | ADHERENS_JUNCTION                      | 74             | 16              | 3              | 1.154 |
| BIOCARTA | BIOCARTA_VEGF_PATHWAY                  | 29             | 9               | 4              | 1.128 |
| KEGG     | TGF-BETA_SIGNALING_PATHWAY             | 85             | 17              | 3              | 1.092 |
| BIOCARTA | BIOCARTA_EDG1_PATHWAY                  | 27             | 10              | 4              | 1.082 |
| KEGG     | BACTERIAL_INVASION_OF_EPITHELIAL_CELLS | 71             | 17              | 3              | 1.049 |
| KEGG     | CAP_JUNCTION                           | 88             | 19              | 3              | 1.003 |
| BIOCARTA | BIOCARTA_EGF_PATHWAY                   | 31             | 10              | 3              | 0.998 |



## Supplemental Figure 1C

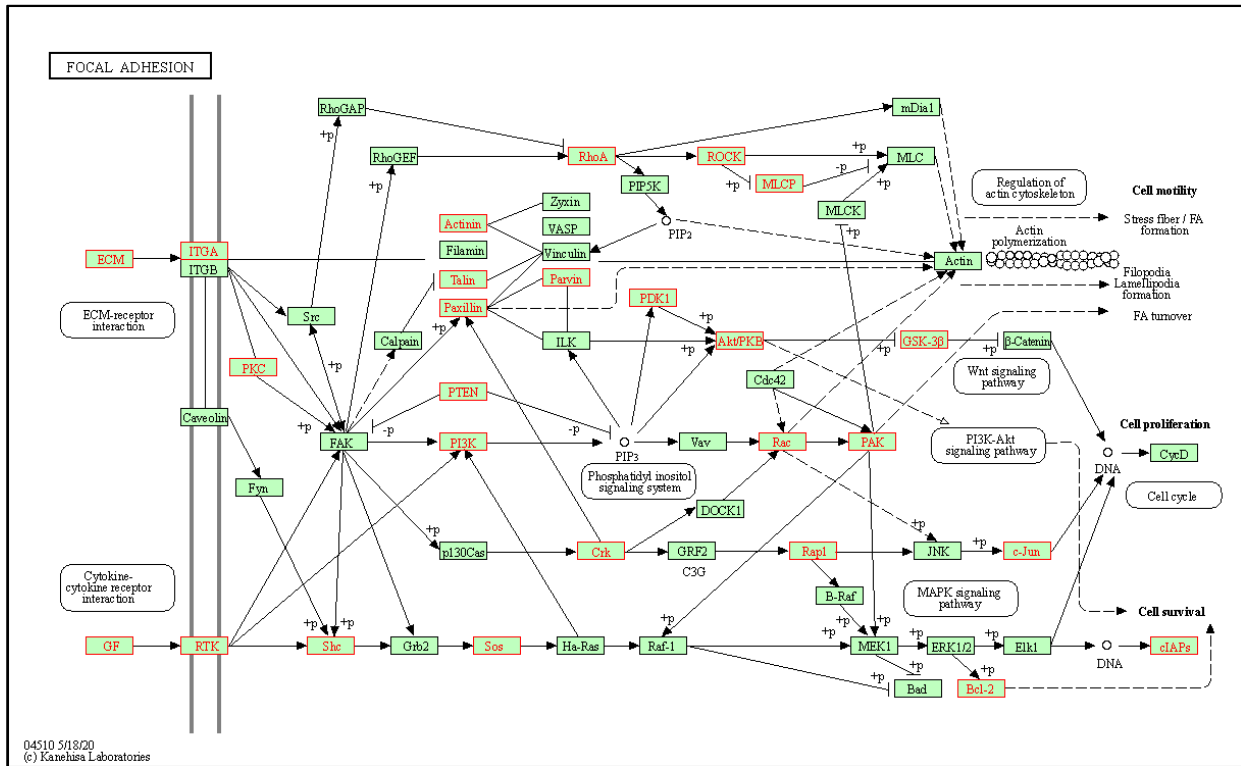

**Supplemental Figure 1:** The top significantly altered miRNAs were used for pathway analysis using the miRSystem, with KEGG and BIOCARTA pathway databases and preset parameters (Hit with  $\geq 3$ ; O/E ratio  $\geq 2$ ; Total genes in the pathway  $\geq 25$ ). Pathway rankings summary (**Fig. A**) revealed, that the Neurotrophin signaling pathway (**Fig. B**) and the Focal adhesion pathway (**Fig. C**) scored high (2.415 and 2.162 respectively). These pathways are involved in regulation of cell proliferation and survival.
